# Supplementary material for: The Temperature of Halite Crystallization in the Badenian Saline Basins, in the Context of Paleoclimate Reconstruction of the Carpathian Area
Source: MDPI journal article supplement (doi:10.3390/min11080831), 2021-07-30
Supplement: s1 [file s1]

# Supplementary Materials: The Temperature of Halite Crystallization in the Badenian Saline Basins in the Context of Paleoclimate Reconstruction of the Carpathian Area

Anatoliy R. Galamay. Krzysztof Bukowski\*. Igor M. Zinzuk and Fanwei Meng

**Table S1.** Inclusion homogenization temperatures of the bottom and cumulate halite from the Badenian salt-bearing deposits of the Carpathian area.

| Sample Number | Sample Location        | Temperature °C                              |      |      |      |      |      |      |      |      |      |      |      |      |      |      |
|---------------|------------------------|---------------------------------------------|------|------|------|------|------|------|------|------|------|------|------|------|------|------|
|               |                        | The Wieliczka Salt Mine                     |      |      |      |      |      |      |      |      |      |      |      |      |      |      |
| 106           | Upper spiza salts      | 20.5                                        | 20.5 | 20.5 | 20.5 | 20.5 | 21.0 | 21.0 | 21.5 | 21.5 | 21.5 | 21.5 | 22.0 | 22.0 | 22.5 | 22.5 |
|               |                        | 22.5                                        | 22.5 | 22.5 | 23.0 | 23.0 | 23.0 | 23.0 | 23.0 | 23.5 | 23.5 | 23.5 | 23.5 | 23.5 | 24.0 | 24.0 |
|               |                        | 25.0                                        | 25.0 | 25.0 | 25.5 | 25.5 | 25.5 | -    | -    | -    | -    | -    | -    | -    | -    | -    |
|               |                        | 18.0                                        | 18.5 | 19.0 | 19.0 | 19.0 | 20.5 | 20.5 | -    | -    | -    | -    | -    | -    | -    | -    |
| 16            | Upper spiza salts      | 18.0                                        | 18.5 | 19.0 | 19.0 | 19.0 | 20.5 | 20.5 | -    | -    | -    | -    | -    | -    | -    | -    |
| 120           | Lower spiza salts      | 16.0                                        | 16.0 | 16.5 | 16.5 | 18.0 | 18.0 | 18.0 | 19.0 | 19.0 | 19.0 | 19.0 | 20.0 | 20.5 | 20.5 | -    |
| 98            | Shaft salt             | 18.5                                        | 18.5 | 18.5 | 19.0 | 19.5 | 19.5 | 19.5 | 19.5 | 20.0 | 20.0 | 21.0 | 21.5 | 21.5 | 22.0 | -    |
| 97            | Shaft salt             | 19.5                                        | 20.0 | 20.5 | 20.5 | 22.5 | 23.0 | 23.5 | 23.5 | 24.0 | 24.0 | 25.0 | 25.0 | 25.5 | 26.0 | -    |
| 91            | Stratiform green salts | 18.0                                        | 19.0 | 19.5 | 19.5 | 20.0 | 20.5 | 21.0 | 21.0 | 22.0 | 22.0 | -    | -    | -    | -    | -    |
| 11            | Stratiform green salts | 15.0                                        | 15.0 | 16.0 | 17.5 | 17.5 | 18.0 | -    | -    | -    | -    | -    | -    | -    | -    | -    |
| Sample Number | Depth (m)              | The Hrynivka Salt Deposit. Borehole No. 525 |      |      |      |      |      |      |      |      |      |      |      |      |      |      |
|               |                        | 13.0                                        | 14.5 | 14.5 | 15.0 | 15.5 | 17.0 | 17.5 | 19.0 | -    | -    | -    | -    | -    | -    | -    |
| 1342          | 304                    | 13.0                                        | 14.5 | 14.5 | 15.0 | 15.5 | 17.0 | 17.5 | 19.0 | -    | -    | -    | -    | -    | -    | -    |
| 1351          | 349                    | 21.5                                        | 22.0 | 22.0 | 22.0 | 22.0 | 22.5 | 23.0 | 24.5 | 24.5 | -    | -    | -    | -    | -    | -    |
| 1352          | 362                    | 18.0                                        | 18.0 | 18.5 | 18.5 | 19.0 | 19.0 | 19.0 | 19.5 | 19.5 | 19.5 | 20.5 | 20.5 | 21.5 | 21.5 | -    |
| 1353          | 366                    | 21.5                                        | 22.5 | 23.0 | 23.0 | 23.5 | 23.5 | 23.5 | 24.0 | 24.0 | -    | -    | -    | -    | -    | -    |
| 1354          | 376                    | 20.5                                        | 23.0 | 23.0 | 23.0 | 23.0 | 23.0 | 25.5 | 25.5 | -    | -    | -    | -    | -    | -    | -    |
| 1357          | 410-411                | 16.0                                        | 17.0 | 17.5 | 17.5 | 18.0 | 18.0 | 18.0 | 19.0 | 19.5 | 19.5 | -    | -    | -    | -    | -    |
| 1361          | 444-448                | 20.5                                        | 20.5 | 21.0 | 21.0 | 21.0 | 21.0 | 22.0 | 22.0 | 23.0 | 23.5 | 23.5 | 24.5 | 24.5 | 25.5 | 26.0 |
| 1362          | 454-456                | 15.5                                        | 17.5 | 17.5 | 17.5 | 18.0 | 18.0 | 18.0 | 19.5 | 20.0 | -    | -    | -    | -    | -    | -    |
| 1369          | 518                    | 15.0                                        | 15.5 | 15.5 | 15.5 | 16.5 | 16.5 | 16.5 | 17.0 | 18.5 | 18.5 | 19.0 | -    | -    | -    | -    |
| Sample Number | Depth (m)              | The Zbudza Salt Deposit. Borehole Ep-2      |      |      |      |      |      |      |      |      |      |      |      |      |      |      |
|               |                        | 19.0                                        | 19.5 | 19.5 | 20.0 | 21.5 | 21.5 | 22.0 | 23.0 | 23.0 | 23.5 | 24.0 | 24.5 | 24.5 | 25.0 | 25.5 |
| 71            | 189.5                  | 26.0                                        | 26.0 | -    | -    | -    | -    | -    | -    | -    | -    | -    | -    | -    | -    | -    |
| 70            | 191.8                  | 16.0                                        | 17.5 | 17.5 | 18.5 | 19.0 | 19.0 | 19.5 | -    | -    | -    | -    | -    | -    | -    | -    |
| 68            | 195.5                  | 20.5                                        | 21.0 | 21.0 | 21.0 | 21.0 | 22.0 | 22.0 | 22.0 | 23.0 | 23.0 | -    | -    | -    | -    | -    |
| 65            | 204.5                  | 18.0                                        | 19.0 | 19.0 | 19.5 | 19.5 | 19.5 | 20.0 | 20.0 | 20.0 | 20.5 | -    | -    | -    | -    | -    |
| 63            | 211.5                  | 17.0                                        | 17.0 | 18.0 | 18.0 | 19.5 | 20.0 | 20.5 | 20.5 | -    | -    | -    | -    | -    | -    | -    |

|               |                                          |                                     |      |      |      |      |      |      |      |      |      |      |      |      |      |      |
|---------------|------------------------------------------|-------------------------------------|------|------|------|------|------|------|------|------|------|------|------|------|------|------|
| 61            | 217.5                                    | 19.5                                | 20.0 | 20.0 | 21.5 | 21.5 | 22.0 | 22.5 | 22.5 | 23.0 | 23.0 | 23.0 | 23.0 | 23.5 | 23.5 | 24.0 |
|               |                                          | 25.0                                | 25.0 | 25.0 | 25.0 | -    | -    | -    | -    | -    | -    | -    | -    | -    | -    | -    |
| 59            | 225.8                                    | 18.5                                | 21.0 | 22.5 | 22.5 | 23.0 | 23.0 | 23.0 | -    | -    | -    | -    | -    | -    | -    | -    |
| 56            | 236.4                                    | 17.5                                | 18.0 | 18.0 | 18.0 | 18.0 | 19.0 | 19.0 | -    | -    | -    | -    | -    | -    | -    | -    |
| 54            | 239.2                                    | 15.0                                | 15.5 | 15.5 | 15.5 | 16.0 | 16.0 | 17.5 | 17.5 | 17.5 | 18.0 | 18.0 | 18.5 | 18.5 | 19.0 | 19.0 |
| 53            | 241.0                                    | 19.0                                | 19.5 | 19.5 | 20.0 | 20.5 | 21.0 | 21.0 | 21.0 | 21.5 | 21.5 | 22.5 | 23.0 | 23.0 | 23.0 | 23.5 |
|               |                                          | 23.5                                | -    | -    | -    | -    | -    | -    | -    | -    | -    | -    | -    | -    | -    | -    |
| 52            | 243.5                                    | 19.5                                | 21.5 | 22.0 | 22.0 | 23.5 | 23.5 | 23.5 | 23.5 | 23.5 | 24.0 | 24.0 | 24.0 | 24.0 | -    | -    |
| 50            | 246.0                                    | 17.5                                | 18.5 | 18.5 | 18.5 | 20.5 | 20.5 | 21.5 | 21.5 | 21.5 | 21.5 | 21.5 | 22.0 | 22.5 | 22.5 | 22.5 |
|               |                                          | 22.5                                | 23.5 | 24.0 | -    | -    | -    | -    | -    | -    | -    | -    | -    | -    | -    | -    |
| Sample Number |                                          | The Slanic-Prahova Salt Mine        |      |      |      |      |      |      |      |      |      |      |      |      |      |      |
| P-25          | Upper Evaporitic Fm.                     | 20.0                                | 20.0 | 21.5 | 21.5 | 22.0 | 22.0 | 22.0 | 23.0 | 23.0 | 23.5 | 24.0 | -    | -    | -    | -    |
| Sample Number |                                          | The Ocna Dej Salt Mine              |      |      |      |      |      |      |      |      |      |      |      |      |      |      |
| P-50          | Ocna Dejului Fm                          | 19.5                                | 20.0 | 20.0 | 20.0 | 21.5 | 21.5 | 21.5 | 22.0 | 22.0 | 23.5 | -    | -    | -    | -    | -    |
| P-52          | Ocna Dejului Fm                          | 15.5                                | 15.5 | 15.5 | 18.0 | 18.5 | 19.5 | 19.5 | 20.5 | -    | -    | -    | -    | -    | -    | -    |
| Sample Number | Type of salt                             | The Solotvyno Salt Mine, mine no. 9 |      |      |      |      |      |      |      |      |      |      |      |      |      |      |
| 116 *         | White, high-quality salt, hopper halite  | 22.5                                | 22.5 | 23.0 | 23.0 | 32.0 | 33.0 | 34.0 | -    | -    | -    | -    | -    | -    | -    | -    |
| 34 *          | White, high-quality salt, hopper halite  | 20.0                                | 20.0 | 23.5 | 25.5 | 26.0 | 34.0 | 34.0 | 34.0 | 34.0 | 34.5 | 34.5 | 36.0 | 36.0 | -    | -    |
| 14            | Gray, substandard salt, chevron halite   | 18.0                                | 19.5 | 19.5 | 20.0 | 20.5 | 20.5 | 23.0 | 23.0 | 23.5 | 23.5 | 23.5 | 23.5 | 25.0 | 25.0 |      |
| 28            | Gray, substandard salt, chevron halite   | 22.0                                | 23.0 | 23.5 | 25.0 | 25.5 | 26.0 | 26.0 | -    | -    | -    | -    | -    | -    | -    | -    |
| 15            | Gray, substandard salt, chevron halite   | 16.0                                | 16.0 | 18.0 | 19.0 | 19.0 | 19.5 | 19.5 | -    | -    | -    | -    | -    | -    | -    | -    |
| 18            | Gray, substandard salt, chevron halite   | 15.0                                | 15.5 | 15.5 | 19.0 | 19.0 | 19.0 | 20.0 | 20.5 | 20.5 | -    | -    | -    | -    | -    | -    |
| 27            | White, high-quality salt, chevron halite | 17.5                                | 22.0 | 22.0 | 23.5 | 23.5 | 24.0 | 24.0 | 25.5 | -    | -    | -    | -    | -    | -    | -    |

Note: \* The cumulate texture of halite.
